# Supplementary material for: Aggregation of Human Trophoblast Cells into Three-Dimensional Culture System Enhances Anti-Inflammatory Characteristics through Cytoskeleton Regulation
Source: Int J Mol Sci. 2018 Aug 8;19(8):2322. doi: 10.3390/ijms19082322 (PMC6121648; doi:10.3390/ijms19082322)
Supplement: Supplementary file 1 [file ijms-19-02322-s001.xlsx]

## Sheet: SupT1
	Supplementary Table 1S.
	Rank	Name	Fold change (3D/2D)	Database object name
	1	CXCL8	130.995	Interleukin-8
	2	G0S2	59.9733	G0/G1 switch protein 2
	3	CXCL1	51.3837	Growth-regulated alpha protein
	4	CA9	29.0672	Carbonic anhydrase 9
	5	IL32	18.4444	Interleukin-32
	6	STC1	17.047	Stanniocalcin-1
	7	SOD2	15.1774	Superoxide dismutase, mitochondrial
	8	BIRC3	14.3414	Baculoviral IAP repeat-containing protein 3
	9	ABCA1	13.1911	ATP-binding cassette sub-family A member 1
	10	TNFAIP3	12.902	Tumor necrosis factor alpha-induced protein 3
	11	PTX3	12.8661	Pentraxin-related protein PTX3
	12	SCG2	12.0329	Secretogranin-2
	13	DDIT4	11.5382	DNA damage-inducible transcript 4 protein
	14	BDKRB2	11.2819	B2 bradykinin receptor
	15	GDF15	11.0903	Growth/differentiation factor 15
	16	TGM2	10.4973	Protein-glutamine gamma-glutamyltransferase 2
	17	NDRG1	10.4253	Protein NDRG1
	18	LOX	9.69156	Protein-lysine 6-oxidase
	19	C10orf10	9.57448
	20	MMP1	9.13841	Interstitial collagenase
	21	PLIN2	9.06124	Perilipin-2
	22	JUNB	8.96634	Transcription factor jun-B
	23	IL6	8.66148	Interleukin-6
	24	CEMIP	8.56839	Cell migration-inducing and hyaluronan-binding protein
	25	IER3	8.55431	Radiation-inducible immediate-early gene IEX-1
	26	MT1X	8.29842	Metallothionein-1X
	27	ITGA2	8.2714	Integrin alpha-2
	28	STMN3	8.20921	Stathmin-3
	29	CA12	8.15796	Carbonic anhydrase 12
	30	IRAK2	8.1573	Interleukin-1 receptor-associated kinase-like 2

## Sheet: SupT2
	Sup Table 2S. Actin regulation-related molecules
	Rank	Name	Fold change (3D/2D)	3D RPKM average	2D RPKM average	Database object name
	1	ITGB3	3.63752	11.2383	3.31157	Integrin beta-3
	2	PIK3R2	2.844	14.6071	5.50344	Phosphatidylinositol 3-kinase regulatory subunit beta
	3	ITGB5	2.73599	29.138	11.4107	Integrin beta-5
	4	ITGA5	2.62	71.0794	29.0775	Integrin alpha-5
	5	MAP2K1	2.0556	37.095	19.3468	Dual specificity mitogen-activated protein kinase kinase 1
	6	RRAS	1.86075	96.3596	55.5129	Ras-related protein R-Ras
	7	RAC3	1.85494	25.6429	14.8133	Ras-related C3 botulinum toxin substrate 3
	8	GIT1	1.75544	26.7435	16.332	ARF GTPase-activating protein GIT1
	9	RAC2	1.65637	4.88839	3.15996	Ras-related C3 botulinum toxin substrate 2
	10	DIAPH2	1.61841	2.65117	1.7555	Protein diaphanous homolog 2
	1	PIK3R3	-2.51352	1.39283	3.75227	Phosphatidylinositol 3-kinase regulatory subunit gamma
	2	MYL9	-2.2825	34.0198	83.2003	Myosin regulatory light polypeptide 9
	3	FGFR4	-2.23779	1.19571	2.87675	Fibroblast growth factor receptor 4
	4	MRAS	-1.99136	1.47935	3.15456	Ras-related protein M-Ras
	5	ENAH	-1.78349	4.63854	8.86323	Protein enabled homolog
	6	ACTB	-1.7343	632.345	1175.37	Actin, cytoplasmic 1
	7	CFL2	-1.57806	11.4385	19.3364	Cofilin-2
	8	ACTN4	-1.49089	66.3275	105.97	Alpha-actinin-4
	9	SSH2	-1.48879	2.55627	4.07949	Protein phosphatase Slingshot homolog 2
	10	PDGFRB	-1.48696	13.7261	21.8746	Platelet-derived growth factor receptor beta
